# Supplementary material for: Titanium carbide-decorated graphite felt as high performance negative electrode in vanadium redox flow batteries
Source: Royal Society of Chemistry journal article supplement (doi:10.1039/c8ta00464a), 2018-01-01
Supplement: c8ta00464a1.pdf [file c8ta00464a1.pdf]

## Supporting Information

### Titanium carbide decorated graphite felt as negative electrode in vanadium redox flow batteries

Purna C. Ghimire<sup>a,b</sup>, Rüdiger Schweiss<sup>c</sup>, Günther G. Scherer<sup>d</sup>, Nyunt Wai<sup>b</sup>,

Tuti M. Lim<sup>e</sup>, Arjun Bhattarai<sup>b,f</sup>, Tam D. Nguyen<sup>a,b</sup>, Qingyu Yan<sup>f\*</sup>

<sup>a</sup>*Interdisciplinary Graduate School, Nanyang Technological University, Singapore*

<sup>b</sup>*Energy Research Institute @Nanyang Technological University, Singapore*

<sup>c</sup>*SGL Carbon GmbH, Meitingen, Germany*

<sup>d</sup>*5607 Hägglingen, Switzerland*

<sup>e</sup>*School of Civil and Environmental Engineering, Nanyang Technological University, Singapore*

<sup>f</sup>*School of Material Science and Engineering, Nanyang Technological University, Singapore*

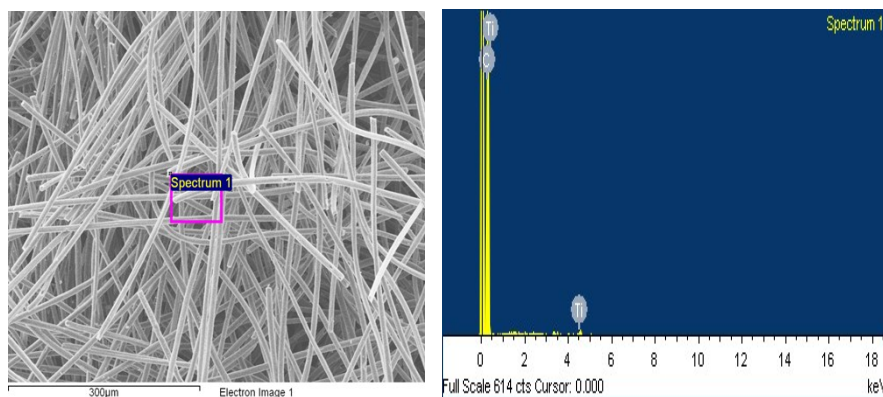

**Fig. S1** FESEM of the section from which EDX spectrum was obtained (left); EDX spectrum (right).

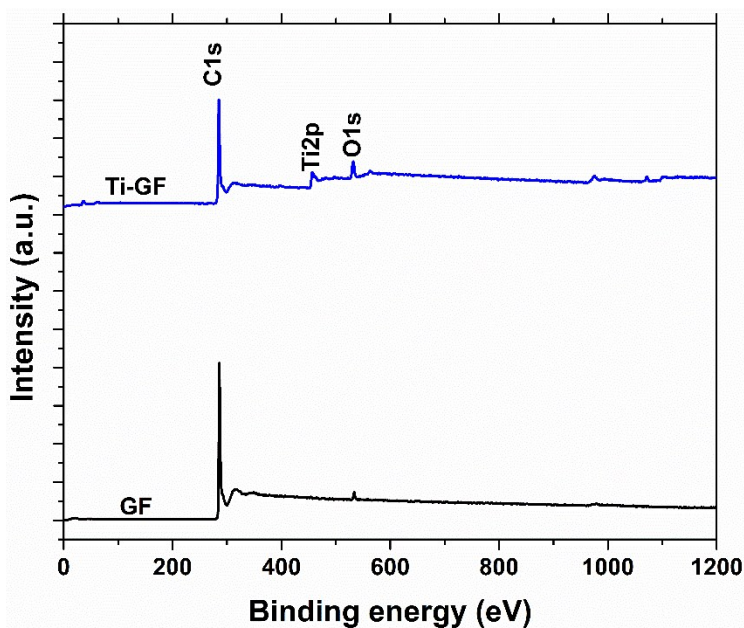

**Fig. S2** XPS survey spectra of pristine graphite felt and TiC decorated graphite felt

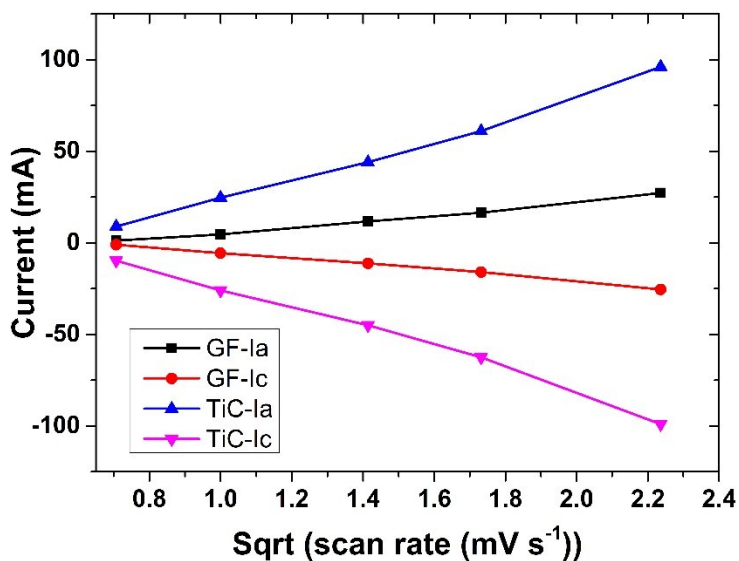

**Fig. S3** Plot of anodic and cathodic current vs square root of scan rate
